# Supplementary material for: Exosome-mediated delivery of CRISPR/Cas9 for targeting of oncogenic KrasG12D in pancreatic cancer
Source: Life Sci Alliance. 2021 Jul 19;4(9):e202000875. doi: 10.26508/lsa.202000875 (PMC8321670; doi:10.26508/lsa.202000875)
Supplement: Supplementary file 1 [file LSA-2020-00875_SdataFS1.1.xlsx]

## Sheet: Figure S1
Figure S1e
	CT, cas9			CT, 18s			ΔCT			1/ΔCT
Untransfected	24.0718	23.9362	23.6696	11.1808	11.169	11.433	12.8109	12.6753	12.4087	0.0780587	0.0788937	0.0805889
LentiCRISPR V2	18.4085	18.4769	18.1389	10.6042	10.5692	11.02	7.67737	7.74571	7.40771	0.130253	0.129104	0.134995
