# Supplementary material for: Exosome-mediated delivery of CRISPR/Cas9 for targeting of oncogenic KrasG12D in pancreatic cancer
Source: Life Sci Alliance. 2021 Jul 19;4(9):e202000875. doi: 10.26508/lsa.202000875 (PMC8321670; doi:10.26508/lsa.202000875)
Supplement: Supplementary file 6 [file LSA-2020-00875_SdataFS2.xlsx]

## Sheet: Figure S2
Figure S2b
GFP standard curve
		1	2	3	4	5	6
		GFP Std	GFP Std	GFP Std	GFP Std	GFP Std	GFP Std
		6.39424	9.81702	14.2402	17.9469	21.89	24.5284
		6.49189	10.5756	14.3918	17.8303	21.8343	24.5374					1 ul
	Mean CT	6.44306	10.1963	14.316	17.8886	21.8622	24.5329			size (bp)	Mw (g/mol)	Conc. (ng/ul)	mol	Copy Number
	SD	0.069046	0.53641	0.107202	0.08245	0.0394279	0.00636991		GFP	8000	5280000	1.5	2.84091e-16	1.71023e+08
Conc.	(ng/uL)	1.5	0.15	0.015	0.0015	0.00015	1.5e-05
Copy Number		1.71023e+08	1.71023e+07	1.71023e+06	171023	17102.3	1710.23
log(copy number)		8.23305	7.23305	6.23305	5.23305	4.23305	3.23305
	CT			log(copy number)			Copy number
Exosomes only -DNase	Undetermined	Undetermined	Undetermined	-	-	-	-	-	-
PX458 -DNase	6.1504	6.44117	6.26149	8.37062	8.29174	8.34048	2.34755e+08	1.95766e+08	2.19017e+08
Exosomes+PX458 -DNase	7.18143	6.96086	6.96388	8.09092	8.15076	8.14994	1.23289e+08	1.41501e+08	1.41234e+08
Exosomes only +DNase	Undetermined	Undetermined	Undetermined	-	-	-	-	-	-
PX458 +DNase	23.6965	31.3436	Undetermined	3.6108	1.53634	-	4081.3	34.383	-
Exosomes+PX458 +DNase	11.4632	12.8811	14.3554	6.92939	6.54475	6.1448	8.49945e+06	3.50549e+06	1.39571e+06
Undetermined: not detected
