# Supplementary material for: Exosome-mediated delivery of CRISPR/Cas9 for targeting of oncogenic KrasG12D in pancreatic cancer
Source: Life Sci Alliance. 2021 Jul 19;4(9):e202000875. doi: 10.26508/lsa.202000875 (PMC8321670; doi:10.26508/lsa.202000875)
Supplement: Supplementary file 8 [file LSA-2020-00875_SdataFS5.xlsx]

## Sheet: Figure S5
Figure S5a
Particle diameter (nm)	Concentration (particles/mL)
2.5	0	0	0
7.5	0	0	0
12.5	0	0	0
17.5	0	0	0
22.5	0	0	0
27.5	0	0	0
32.5	0	0	0
37.5	0	0	0
42.5	0	0	0
47.5	0	7600	1200
52.5	0	145200	48000
57.5	16600	2295200	1358800
62.5	1305400	31511200	23768000
67.5	30718200	270907200	216914600
72.5	311007600	1143466200	998263000
77.5	1580773000	2642672800	2683348600
82.5	4305459200	4703746800	5216022400
87.5	7505883200	8308997400	8542669000
92.5	11082481800	14632615400	12656127600
97.5	16662442000	22800232800	17508319400
102.5	24982207000	29848042400	22994343200
107.5	33190173200	34675814400	28805585400
112.5	36963689400	38541802400	34330378600
117.5	36134104600	42062524000	38743087600
122.5	33695209200	44304715800	41294805400
127.5	31726470000	44112969800	41812651000
132.5	30701918600	41436256800	40939548600
137.5	30436912600	37239999400	39626665200
142.5	30650845000	32595775400	38316570000
147.5	30988078400	28129714400	36582997000
152.5	30880770000	24063220800	33519501400
157.5	29631049000	20470256400	28686873000
162.5	26832116400	17439095400	22772601400
167.5	22774144000	15068280400	17122741600
172.5	18318744800	13390469800	12718699400
177.5	14324160000	12323983400	9776359000
182.5	11223938600	11666912000	8033561000
187.5	9030515400	11115044600	7110800200
192.5	7542284200	10326158800	6663325000
197.5	6511968400	9064299000	6398677400
202.5	5724772400	7355875200	6084690800
207.5	5027487600	5490050200	5591305600
212.5	4339601200	3819667400	4921494200
217.5	3647726800	2551705400	4176018400
222.5	2979988800	1702335400	3471374600
227.5	2372536400	1181048200	2878110000
232.5	1847163000	881073400	2409581400
237.5	1407203200	721115600	2041258200
242.5	1044999800	650172600	1734062600
247.5	750926200	638937600	1451976800
252.5	518065800	670073200	1174155600
257.5	341688400	730786400	900559800
262.5	216170400	808271400	647745200
267.5	133004600	888342200	436052800
272.5	81596000	957075600	276916400
277.5	51658600	1003919400	168666600
282.5	35123200	1023856000	100797600
287.5	26679200	1017133000	60640000
292.5	23389400	987001800	37663000
297.5	24138800	937080200	24683400
302.5	29415800	869736400	17350600
307.5	41707600	786007200	13208000
312.5	66738200	686814000	10921600
317.5	115569800	574770600	9783000
322.5	206455400	455589600	9425400
327.5	362511800	338068600	9671600
332.5	598574600	232210000	10453600
337.5	895747200	146157600	11771000
342.5	1181633400	83610000	13668800
347.5	1349757000	43216000	16224800
352.5	1324227800	20118800	19542600
357.5	1116753800	8433600	23746400
362.5	816618600	3191600	28975400
367.5	525775000	1096600	35377200
372.5	304241800	345000	43097200
377.5	162116400	100400	52264000
382.5	81687200	27400	62967200
387.5	39998600	7200	75228800
392.5	19544400	1800	88968400
397.5	9765400	400	103964800
402.5	5095800	0	119821400
407.5	2824400	0	135944000
412.5	1683000	0	151539600
417.5	1086200	0	165650800
422.5	761000	0	177227000
427.5	578000	0	185235800
432.5	473200	0	188801600
437.5	414800	0	187347000
442.5	385600	0	180710000
447.5	376200	0	169205400
452.5	381800	0	153611400
457.5	399400	0	135074200
462.5	426800	0	114951000
467.5	463000	0	94621600
472.5	507000	0	75308800
477.5	558400	0	57945200
482.5	617000	0	43107000
487.5	682600	0	31015200
492.5	756000	0	21594400
497.5	838400	0	14560800
502.5	931800	0	9518000
507.5	1039000	0	6038800
512.5	1163800	0	3724000
517.5	1311200	0	2235800
522.5	1487600	0	1309200
527.5	1700800	0	749200
532.5	1960600	0	419800
537.5	2278800	0	230800
542.5	2669800	0	124800
547.5	3149800	0	66600
552.5	3738200	0	35200
557.5	4455200	0	18400
562.5	5322000	0	9600
567.5	6358200	0	5000
572.5	7578800	0	2600
577.5	8989800	0	1200
582.5	10584000	0	600
587.5	12335400	0	400
592.5	14194000	0	0
597.5	16084200	0	0
602.5	17904400	0	0
607.5	19533800	0	0
612.5	20842000	0	0
617.5	21704400	0	0
622.5	22020800	0	0
627.5	21731600	0	0
632.5	20830400	0	0
637.5	19369400	0	0
642.5	17453400	0	0
647.5	15226600	0	0
652.5	12851800	0	0
657.5	10488600	0	0
662.5	8273000	0	0
667.5	6304600	0	0
672.5	4641200	0	0
677.5	3300200	0	0
682.5	2266600	0	0
687.5	1503800	0	0
692.5	963800	0	0
697.5	597000	0	0
702.5	357400	0	0
707.5	207000	0	0
712.5	115800	0	0
717.5	62800	0	0
722.5	33000	0	0
727.5	16800	0	0
732.5	8200	0	0
737.5	4000	0	0
742.5	1800	0	0
747.5	800	0	0
752.5	400	0	0
757.5	0	0	0
762.5	0	0	0
767.5	0	0	0
772.5	0	0	0
777.5	0	0	0
782.5	0	0	0
787.5	0	0	0
792.5	0	0	0
797.5	0	0	0
802.5	0	0	0
807.5	0	0	0
812.5	0	0	0
817.5	0	0	0
822.5	0	0	0
827.5	0	0	0
832.5	0	0	0
837.5	0	0	0
842.5	0	0	0
847.5	0	0	0
852.5	0	0	0
857.5	0	0	0
862.5	0	0	0
867.5	0	0	0
872.5	0	0	0
877.5	0	0	0
882.5	0	0	0
887.5	0	0	0
892.5	0	0	0
897.5	0	0	0
902.5	0	0	0
907.5	0	0	0
912.5	0	0	0
917.5	0	0	0
922.5	0	0	0
927.5	0	0	0
932.5	0	0	0
937.5	0	0	0
942.5	0	0	0
947.5	0	0	0
952.5	0	0	0
957.5	0	0	0
962.5	0	0	0
967.5	0	0	0
972.5	0	0	0
977.5	0	0	0
982.5	0	0	0
987.5	0	0	0
992.5	0	0	0
997.5	0	0	0
