# Supplementary material for: Exosome-mediated delivery of CRISPR/Cas9 for targeting of oncogenic KrasG12D in pancreatic cancer
Source: Life Sci Alliance. 2021 Jul 19;4(9):e202000875. doi: 10.26508/lsa.202000875 (PMC8321670; doi:10.26508/lsa.202000875)
Supplement: Supplementary file 9 [file LSA-2020-00875_SdataF3.xlsx]

## Sheet: Figure 3
Figure 3a
Mouse #	Exosomes + Exo-Fect	KrasG12D sgRNA1	Exo-Fect + KrasG12D sgRNA1	Exosomes + Exo-Fect + vector control	Exosomes + Exo-Fect + KrasG12D sgRNA1
1	171.405	232.629	326.987	85.1861	354.646
2	654.578	647.223	135.924	253.6	221.649
3	405.815	219.468	235.245	267.266	64.254
4	279.816	648.251	230.985	284.31	194.984
5	251.216	416.521	320.064	332.089	146.836
6	660.288	246.876	398.262	451.801	66.0512
7	293.916	286.29	430.9	342.438	131.541
8	284.93	510.025	213.604	315.692	175.574
Figure 3b
Mouse #	Exosomes + Exo-Fect	KrasG12D sgRNA1	Exo-Fect + KrasG12D sgRNA1	Exosomes + Exo-Fect + vector control	Exosomes + Exo-Fect + KrasG12D sgRNA1
1	22.65	22.86	20.28	21.55	20.34
2	22.12	20.29	21.98	21.19	21.54
3	20.17	21.5	20.77	20.29	21.81
4	20.38	23.84	21.55	19.91	21.23
5	21.75	21.59	21.46	21.9	21.18
6	20.74	20.92	22.2	23.14	20.39
7	21.57	21.03	17.62	21.6	23.83
8	20.88	21.46	20.74	21.27	18.8
Figure 3c
Mouse #	Exosomes + Exo-Fect	KrasG12D sgRNA1	Exo-Fect + KrasG12D sgRNA1	Exosomes + Exo-Fect + vector control	Exosomes + Exo-Fect + KrasG12D sgRNA1
1	0.11	0.16	0.15	0.06	0.24
2	0.42	0.39	0.02	0.13	0.15
3	0.26	0.15	0.08	0.15	0.06
4	0.13	0.47	0.12	0.13	0.12
5	0.12	0.29	0.2	0.22	0.1
6	0.38	0.2	0.37	0.24	0.05
7	0.15	0.18	0.32	0.17	0.04
8	0.15	0.31	0.11	0.2	0.09
Figure 3d
Mouse #	Exosomes + Exo-Fect	KrasG12D sgRNA1	Exo-Fect + KrasG12D sgRNA1	Exosomes + Exo-Fect + vector control	Exosomes + Exo-Fect + KrasG12D sgRNA1
1	0.479121	0.690501	0.729699	0.274678	1.16407
2	1.8732	1.89628	0.0897682	0.605247	0.687015
3	1.27171	0.688293	0.379991	0.729339	0.271404
4	0.629303	1.94497	0.549357	0.644158	0.557637
5	0.544305	1.32515	0.919434	0.991058	0.465795
6	1.80757	0.943167	1.64426	1.02322	0.241921
7	0.686059	0.84441	1.7917	0.776454	0.165599
8	0.708731	1.42512	0.523244	0.927647	0.472286
Figure 3e
	CT, cas9			CT, 18s			ΔCT			1/ΔCT			Average 1/ΔCT
Exosomes+Exo-Fect mouse 1	32.6516	Undetermined	33.0065	10.2648	10.243	10.1436	22.4345	-	22.7894	0.0445742	-	0.04388	0.0442271
Exosomes+Exo-Fect mouse 2	29.1937	29.5092	29.1454	10.0883	10.0381	10.0472	19.1358	19.4513	19.0875	0.0522581	0.0514104	0.0523902	0.0520196
Exosomes+Exo-Fect mouse 3	29.8974	29.7718	29.6885	10.4753	10.4471	10.3593	19.4702	19.3446	19.2613	0.0513605	0.0516941	0.0519176	0.0516574
Exosomes+Exo-Fect mouse 4	29.8303	30.3993	30.8394	10.6186	10.6987	10.7164	19.1524	19.7215	20.1615	0.0522129	0.0507062	0.0495994	0.0508395
Exosomes+Exo-Fect mouse 5	28.6135	29.1271	28.75	10.8142	10.7785	10.7084	17.8465	18.3601	17.983	0.0560334	0.054466	0.0556081	0.0553692
KrasG12D sgRNA1 mouse 1	30.5514	30.5597	30.6664	10.2616	10.2977	10.1496	20.3151	20.3234	20.4301	0.0492245	0.0492044	0.0489473	0.0491254
KrasG12D sgRNA1 mouse 2	30.834	30.974	31.5214	9.98098	10.201	10.0195	20.7668	20.9069	21.4543	0.0481537	0.0478312	0.0466108	0.0475319
KrasG12D sgRNA1 mouse 3	30.7732	31.6653	31.8009	9.28669	9.32145	9.3611	21.4502	22.3422	22.4778	0.0466197	0.0447583	0.0444882	0.0452888
KrasG12D sgRNA1 mouse 4	32.4307	31.8681	32.6716	9.96804	9.74172	9.78673	22.5985	22.0359	22.8395	0.0442507	0.0453805	0.0437839	0.0444717
KrasG12D sgRNA1 mouse 5	31.1757	31.1571	31.6155	10.0997	10.0855	10.016	21.1086	21.0901	21.5484	0.047374	0.0474157	0.0464071	0.0470656
Exo-Fect + KrasG12D sgRNA1 mouse 1	24.6029	24.4703	24.4476	10.1585	10.2096	9.88514	14.5185	14.3859	14.3632	0.0688777	0.0695123	0.0696226	0.0693375
Exo-Fect + KrasG12D sgRNA1 mouse 2	23.5739	23.6079	23.6069	9.82069	9.74713	9.86759	13.7621	13.7961	13.7951	0.0726631	0.0724841	0.0724897	0.0725457
Exo-Fect + KrasG12D sgRNA1 mouse 3	18.7457	18.783	18.5874	9.9381	9.74318	9.71767	8.94609	8.98339	8.78778	0.111781	0.111317	0.113794	0.112297
Exo-Fect + KrasG12D sgRNA1 mouse 4	24.9656	25.0841	25.0041	9.67413	9.62203	9.6124	15.3294	15.4479	15.3679	0.0652341	0.0647338	0.0650707	0.0650129
Exo-Fect + KrasG12D sgRNA1 mouse 5	24.0709	24.1525	24.0901	9.76103	9.76486	9.78405	14.3009	14.3826	14.3201	0.0699255	0.0695287	0.0698319	0.069762
Exosomes + Exo-Fect + vector control mouse 1	21.1776	21.1577	21.5291	10.0905	9.90624	9.87064	11.2218	11.2019	11.5733	0.0891121	0.0892705	0.0864059	0.0882628
Exosomes + Exo-Fect + vector control mouse 2	19.914	19.9479	19.9182	10.6742	10.5352	10.5405	9.33067	9.3646	9.33493	0.107173	0.106785	0.107124	0.107028
Exosomes + Exo-Fect + vector control mouse 3	23.5625	23.3768	23.4989	9.66758	9.66139	9.38303	13.9918	13.8061	13.9282	0.0714705	0.0724318	0.0717967	0.0718996
Exosomes + Exo-Fect + vector control mouse 4	20.1634	20.2428	20.2144	10.7024	10.4493	10.6953	9.54771	9.62718	9.59876	0.104737	0.103873	0.10418	0.104263
Exosomes + Exo-Fect + vector control mouse 5	25.2379	25.2831	25.2119	11.892	11.6662	11.8625	13.431	13.4762	13.405	0.0744544	0.074205	0.0745991	0.0744195
Exosomes + Exo-Fect + KrasG12D sgRNA1 mouse 1	21.0483	20.9653	20.8659	9.78169	9.83163	9.79684	11.2449	11.1619	11.0625	0.088929	0.0895902	0.0903952	0.0896381
Exosomes + Exo-Fect + KrasG12D sgRNA1 mouse 2	21.2763	21.1675	21.1257	9.7629	9.72605	9.58978	11.5834	11.4746	11.4328	0.0863306	0.0871492	0.0874678	0.0869825
Exosomes + Exo-Fect + KrasG12D sgRNA1 mouse 3	21.66	21.7212	21.6426	10.5823	10.6979	10.5645	11.0451	11.1063	11.0277	0.0905379	0.0900387	0.0906805	0.090419
Exosomes + Exo-Fect + KrasG12D sgRNA1 mouse 4	24.7743	24.7057	24.7549	9.91908	9.7407	9.80165	14.9538	14.8852	14.9344	0.0668725	0.0671808	0.0669596	0.0670043
Exosomes + Exo-Fect + KrasG12D sgRNA1 mouse 5	18.7076	18.6794	18.7019	9.46267	9.47692	9.49413	9.22971	9.20147	9.22399	0.108346	0.108678	0.108413	0.108479
Undetermined: not detected
