# Supplementary material for: Exosome-mediated delivery of CRISPR/Cas9 for targeting of oncogenic KrasG12D in pancreatic cancer
Source: Life Sci Alliance. 2021 Jul 19;4(9):e202000875. doi: 10.26508/lsa.202000875 (PMC8321670; doi:10.26508/lsa.202000875)
Supplement: Supplementary file 11 [file LSA-2020-00875_SdataF4.xlsx]

## Sheet: Figure 4
Figure 4a
	Raw bioluminescence values					Relative change in bioluminescence (normalized to day 0)
	Day 0	Day 10	Day 20	Day 24		Day 0	Day 10	Day 20	Day 24
Exosomes + Exo-Fect mouse 1	347300	178300	22000000	15000000		1	0.513389	63.3458	43.1903
Exosomes + Exo-Fect mouse 2	921000	129500	342000	649800		1	0.140608	0.371336	0.705537
Exosomes + Exo-Fect mouse 3	2369000	147300	76900000	93260000		1	0.0621781	32.461	39.3668
Exosomes + Exo-Fect mouse 4	118400	26900000	22900000	107500000		1	227.196	193.412	907.939
KrasG12D sgRNA1 mouse 1	569400	109800	7440000	12110000		1	0.192835	13.0664	21.268
KrasG12D sgRNA1 mouse 2	923800	2313000	7410000	52770000		1	2.50379	8.02122	57.1228
KrasG12D sgRNA1 mouse 3	2917000	11400000	16300000	83170000		1	3.90812	5.58793	28.5122
Exosomes + Exo-Fect + vector control mouse 1	632400	2197000	8480000	3581000		1	3.47407	13.4092	5.66256
Exosomes + Exo-Fect + vector control mouse 2	1343000	3049000	8670000	18510000		1	2.27029	6.4557	13.7826
Exosomes + Exo-Fect + vector control mouse 3	3452000	24270000	53700000	76580000		1	7.03071	15.5562	22.1842
Exosomes + Exo-Fect + vector control mouse 4	103600	13800000	13100000	78810000		1	133.205	126.448	760.714
Exosomes + Exo-Fect + KrasG12D sgRNA1 mouse 1	872300	4492000	4330000	14110000		1	5.1496	4.96389	16.1756
Exosomes + Exo-Fect + KrasG12D sgRNA1 mouse 2	1390000	3273000	921000	32440000		1	2.35468	0.66259	23.3381
Exosomes + Exo-Fect + KrasG12D sgRNA1 mouse 3	3477000	5768000	5960000	9352000		1	1.6589	1.71412	2.68968
Exosomes + Exo-Fect + KrasG12D sgRNA1 mouse 4	228400	421200	407000	504100		1	1.84413	1.78196	2.20709
Figure 4b
	CT, KrasG12D			CT, 18s			ΔCT			ΔΔCT			Relative expression (2^-ΔΔCT)			Average relative expression (2^-ΔΔCT)
Exosomes + Exo-Fect mouse 1	24.3967	24.3009	24.7078	9.86877	9.84332	9.9186	14.5199	14.424	14.8309	0.741444	0.645592	1.05249	0.598141	0.639231	0.482136	0.573169
Exosomes + Exo-Fect mouse 2	26.0662	26.0654	26.1946	11.5059	11.606	11.609	14.4926	14.4918	14.621	0.714141	0.713372	0.842555	0.609568	0.609893	0.557655	0.592372
Exosomes + Exo-Fect mouse 3	23.4099	23.712	23.695	11.0877	11.0329	11.2547	12.2849	12.587	12.57	-1.49353	-1.19145	-1.20843	2.81576	2.28382	2.31086	2.47015
Exosomes + Exo-Fect mouse 4	21.4474	21.3959	21.5096	7.94103	8.17399	7.71883	13.5028	13.4513	13.565	-0.275637	-0.32711	-0.213444	1.21053	1.2545	1.15945	1.20816
KrasG12D sgRNA1 mouse 1	23.6487	23.9362	23.7429	10.3613	10.326	10.2791	13.3265	13.6141	13.4207	-0.451897	-0.164323	-0.357692	1.36784	1.12064	1.28137	1.25662
KrasG12D sgRNA1 mouse 2	24.4666	24.4737	24.4026	11.5427	11.548	11.7521	12.8523	12.8594	12.7883	-0.926107	-0.919027	-0.990066	1.90014	1.89084	1.98628	1.92575
KrasG12D sgRNA1 mouse 3	24.0256	24.0837	24.0795	10.5788	10.867	10.8331	13.266	13.3241	13.3199	-0.512427	-0.454356	-0.458512	1.42645	1.37017	1.37412	1.39025
Exosomes + Exo-Fect + vector control mouse 1	24.3246	24.4027	24.3841	11.8941	11.6175	11.7055	12.5855	12.6637	12.645	-1.19288	-1.11471	-1.13338	2.28609	2.16551	2.19372	2.21511
Exosomes + Exo-Fect + vector control mouse 2	21.9758	22.0424	21.988	7.85588	7.61616	7.73471	14.2402	14.3068	14.2525	0.461821	0.528366	0.474041	0.726069	0.69334	0.719945	0.713118
Exosomes + Exo-Fect + vector control mouse 3	26.8816	26.9946	26.9178	8.19811	8.19438	7.8586	18.7979	18.9109	18.8341	5.01949	5.13252	5.05566	0.0308308	0.0285074	0.0300673	0.0298018
Exosomes + Exo-Fect + vector control mouse 4	21.293	21.4748	21.4144	7.83591	7.6718	8.14025	13.4103	13.5921	13.5317	-0.368083	-0.18629	-0.246694	1.29064	1.13783	1.18648	1.20499
Exosomes + Exo-Fect + KrasG12D sgRNA1 mouse 1	24.4582	24.4265	24.4471	10.0869	10.0906	10.3436	14.2845	14.2528	14.2734	0.506082	0.474418	0.494956	0.704132	0.719757	0.709583	0.711158
Exosomes + Exo-Fect + KrasG12D sgRNA1 mouse 2	21.5357	21.4692	21.5496	7.70294	7.67164	9.34267	13.2966	13.2301	13.3105	-0.481778	-0.54832	-0.467906	1.39646	1.46238	1.3831	1.41398
Exosomes + Exo-Fect + KrasG12D sgRNA1 mouse 3	21.6659	21.6617	21.6923	7.22756	7.19728	7.33748	14.4118	14.4076	14.4382	0.633366	0.629222	0.659781	0.64467	0.646525	0.632974	0.64139
Exosomes + Exo-Fect + KrasG12D sgRNA1 mouse 4	23.4804	23.6142	23.3376	6.89388	6.76992	6.95597	16.6071	16.7409	16.4644	2.82869	2.96253	2.68596	0.14076	0.128289	0.155397	0.141482
Figure 4c
	CT, cas9			CT, 18s			ΔCT			1/ΔCT			Average 1/ΔCT
Exosomes + Exo-Fect mouse 1	25.7489	25.5827	25.7366	9.86877	9.84332	9.9186	15.872	15.7058	15.8597	0.0630041	0.0636708	0.0630528	0.0632426
Exosomes + Exo-Fect mouse 2	25.4857	25.8648	25.3261	11.5059	11.606	11.609	13.9121	14.2912	13.7525	0.07188	0.0699731	0.0727139	0.0715223
Exosomes + Exo-Fect mouse 3	25.7501	25.517	24.9831	11.0877	11.0329	11.2547	14.6251	14.3919	13.8581	0.0683757	0.0694833	0.0721601	0.0700064
Exosomes + Exo-Fect mouse 4	26.9108	27.082	26.9484	7.94103	8.17399	7.71883	18.9662	19.1374	19.0038	0.0527253	0.0522538	0.0526211	0.0525334
KrasG12D sgRNA1 mouse 1	25.5994	25.5599	25.4536	10.3613	10.326	10.2791	15.2773	15.2378	15.1314	0.0654567	0.0656264	0.0660877	0.0657236
KrasG12D sgRNA1 mouse 2	25.5403	25.4503	25.4308	11.5427	11.548	11.7521	13.926	13.836	13.8165	0.0718083	0.0722751	0.0723771	0.0721535
KrasG12D sgRNA1 mouse 3	25.6939	25.649	25.541	10.5788	10.867	10.8331	14.9342	14.8894	14.7814	0.0669603	0.0671621	0.0676526	0.0672583
Exosomes + Exo-Fect + vector control mouse 1	22.2975	22.1842	22.2542	11.8941	11.6175	11.7055	10.5585	10.4452	10.5151	0.0947108	0.0957377	0.0951012	0.0951832
Exosomes + Exo-Fect + vector control mouse 2	25.0269	25.3811	25.2347	7.85588	7.61616	7.73471	17.2913	17.6455	17.4991	0.0578326	0.0566718	0.0571459	0.0572168
Exosomes + Exo-Fect + vector control mouse 3	23.592	23.4969	23.4854	8.19811	8.19438	7.8586	15.5083	15.4133	15.4017	0.0644818	0.0648792	0.0649278	0.0647629
Exosomes + Exo-Fect + vector control mouse 4	25.0984	25.1695	25.0781	7.83591	7.6718	8.14025	17.2158	17.2868	17.1954	0.0580863	0.0578475	0.0581549	0.0580296
Exosomes + Exo-Fect + KrasG12D sgRNA1 mouse 1	19.7534	19.0174	19.0729	10.0869	10.0906	10.3436	9.57973	8.84372	8.89919	0.104387	0.113075	0.11237	0.109944
Exosomes + Exo-Fect + KrasG12D sgRNA1 mouse 2	26.0763	26.1	25.9685	7.70294	7.67164	9.34267	17.8372	17.8609	17.7294	0.0560626	0.0559881	0.0564034	0.0561514
Exosomes + Exo-Fect + KrasG12D sgRNA1 mouse 3	26.3528	26.4893	26.3381	7.22756	7.19728	7.33748	19.0987	19.2352	19.084	0.0523596	0.0519879	0.0523998	0.0522491
Exosomes + Exo-Fect + KrasG12D sgRNA1 mouse 4	24.3603	24.2032	24.2836	6.89388	6.76992	6.95597	17.487	17.33	17.4103	0.0571853	0.0577035	0.0574373	0.057442
